# Supplementary material for: Identification of Pre-Diagnostic Metabolic Patterns for Glioma Using Subset Analysis of Matched Repeated Time Points
Source: Cancers (Basel). 2020 Nov 12;12(11):3349. doi: 10.3390/cancers12113349 (PMC7696703; doi:10.3390/cancers12113349)
Supplement: Supplementary file 1 [file cancers-12-03349-s001.zip › Supplementary Table S1.pdf]

**Supplementary Table S1. Characteristics of the study population with pre-diagnostic repeated blood samples**

|                                              | Cases |         | Controls |         | P-value <sup>a</sup> |
|----------------------------------------------|-------|---------|----------|---------|----------------------|
|                                              | N     | %       | N        | %       |                      |
|                                              | 64    |         | 64       |         |                      |
| Age at sample collection, years              |       |         |          |         | <sup>b</sup>         |
| Baseline sample, mean (range)                | 48.8  | (30-61) | 48.8     | (30-60) |                      |
| Repeated sample, mean (range)                | 56.3  | (40-68) | 56.3     | (40-68) |                      |
| Time between blood draw and diagnosis, years |       |         |          |         |                      |
| Baseline sample, mean (SD)                   | 11.7  | 5.6     | -        | -       |                      |
| Repeated sample, mean (SD)                   | 4.2   | 3       | -        | -       |                      |
| Sex                                          |       |         |          |         | <sup>b</sup>         |
| Female                                       | 50    | 78.1    | 50       | 78.1    |                      |
| Male                                         | 14    | 21.9    | 14       | 21.9    |                      |
| Body mass index                              |       |         |          |         |                      |
| Baseline sample, mean (SD)                   | 24.7  | (3.2)   | 25.7     | (3.2)   | 0.18                 |
| Unknown                                      | 1     |         | 2        |         |                      |
| Repeated sample, mean (SD)                   | 25.9  | (3.5)   | 26.3     | (3.4)   | 0.56                 |
| Unknown                                      | 6     |         | 9        |         |                      |
| Smoking status                               |       |         |          |         |                      |
| Baseline sample                              |       |         |          |         | 0.50                 |
| Non-smoker                                   | 26    | 40.6    | 22       | 34.4    |                      |
| Current smoker                               | 10    | 15.6    | 17       | 26.6    |                      |
| Former smoker                                | 13    | 20.3    | 11       | 17.2    |                      |
| Unknown                                      | 15    | 23.4    | 14       | 21.9    |                      |
| Repeated sample                              |       |         |          |         | 0.30                 |
| Non-smoker                                   | 20    | 31.3    | 14       | 21.9    |                      |
| Current smoker                               | 6     | 9.4     | 6        | 9.4     |                      |
| Former smoker                                | 4     | 6.3     | 10       | 15.6    |                      |
| Unknown                                      | 34    | 53.1    | 34       | 53.1    |                      |
| Individual fasting status                    |       |         |          |         |                      |
| Baseline sample                              |       |         |          |         | 0.94                 |
| 0-4 hours                                    | 13    | 20.3    | 14       | 21.9    |                      |
| 4-8 hours                                    | 13    | 20.3    | 14       | 21.9    |                      |
| > 8 hours                                    | 38    | 59.4    | 36       | 56.3    |                      |
| Repeated sample                              |       |         |          |         | 0.60                 |
| 0-4 hours                                    | 33    | 51.6    | 33       | 51.6    |                      |
| 4-8 hours                                    | 1     | 1.6     | 0        | -       |                      |
| > 8 hours                                    | 30    | 46.9    | 31       | 48.4    |                      |
| Thawing cycles before                        |       |         |          |         |                      |
| Baseline sample                              |       |         |          |         | 1.00                 |
| no                                           | 59    | 92.2    | 60       | 93.8    |                      |
| once                                         | 5     | 7.8     | 4        | 6.2     |                      |
| Repeated sample                              |       |         |          |         | -                    |
| no                                           | 64    | 100     | 64       | 100     |                      |
| once                                         | 0     | -       | 0        | -       |                      |
| Glioma subtypes                              |       |         |          |         |                      |
| Glioblastoma                                 | 43    | 67.2    |          |         |                      |

|                                 |   |     |
|---------------------------------|---|-----|
| Oligodendroglioma               | 6 | 9.4 |
| Anaplastic oligodendroglioma    | 2 | 3.1 |
| Astrocytoma, anaplastic type    | 6 | 9.4 |
| Astrocytoma                     | 2 | 3.1 |
| Glioma, not otherwise specified | 5 | 7.8 |

---

<sup>a</sup>P-values calculated using paired t-test for continuous- and Chi-square test for categorical variables as well as the Fisher's exact test when appropriate

<sup>b</sup>Matching factors
