# Supplementary material for: Identification of Pre-Diagnostic Metabolic Patterns for Glioma Using Subset Analysis of Matched Repeated Time Points
Source: Cancers (Basel). 2020 Nov 12;12(11):3349. doi: 10.3390/cancers12113349 (PMC7696703; doi:10.3390/cancers12113349)
Supplement: Supplementary file 1 [file cancers-12-03349-s001.zip › Supplementary Table S2.pdf]

**Supplementary Table S2. Characteristics of the study population with pre-diagnostic single blood samples**

|                                              | Cases |         | Controls |         | P-value <sup>a</sup> |
|----------------------------------------------|-------|---------|----------|---------|----------------------|
|                                              | N     | %       | N        | %       |                      |
| Age at sample collection, years              | 68    |         | 68       |         |                      |
| Mean (range)                                 | 52.7  | (30-68) | 52.7     | (30-68) | <sup>b</sup>         |
| Time between blood draw and diagnosis, years |       |         |          |         |                      |
| Mean (SD)                                    | 8     | 5.4     | -        | -       |                      |
| Sex                                          |       |         |          |         | <sup>b</sup>         |
| Female                                       | 19    | 27.9    | 19       | 27.9    |                      |
| Male                                         | 49    | 72.1    | 49       | 72.1    |                      |
| Body mass index                              |       |         |          |         | 0.11                 |
| Mean (SD)                                    | 26.0  | (3.7)   | 26.9     | (4.1)   |                      |
| Unknown                                      | 2     |         | 3        |         |                      |
| Smoking status                               |       |         |          |         | 0.50                 |
| Non-smoker                                   | 27    | 39.7    | 19       | 27.9    |                      |
| Current smoker                               | 10    | 14.7    | 13       | 19.1    |                      |
| Former smoker                                | 19    | 27.9    | 24       | 35.3    |                      |
| Unknown                                      | 12    | 17.6    | 12       | 17.6    |                      |
| Individual fasting status                    |       |         |          |         | 0.87                 |
| 0-4 hours                                    | 9     | 13.2    | 11       | 16.2    |                      |
| 4-8 hours                                    | 13    | 19.1    | 12       | 17.6    |                      |
| > 8 hours                                    | 46    | 67.6    | 44       | 64.7    |                      |
| Thawing cycles before                        |       |         |          |         | 1.00                 |
| no                                           | 66    | 97.1    | 66       | 97.1    |                      |
| once                                         | 2     | 2.9     | 2        | 2.9     |                      |
| Glioma subtypes                              |       |         |          |         |                      |
| Glioblastoma                                 | 37    | 54.4    |          |         |                      |
| Oligodendroglioma                            | 3     | 4.4     |          |         |                      |
| Anaplastic oligodendroglioma                 | 3     | 4.4     |          |         |                      |
| Astrocytoma, anaplastic type                 | 11    | 16.2    |          |         |                      |
| Astrocytoma                                  | 7     | 10.3    |          |         |                      |
| Gliosarcoma                                  | 2     | 2.9     |          |         |                      |
| Glioma, not otherwise specified              | 5     | 7.4     |          |         |                      |

<sup>a</sup>P-values calculated using paired t-test for continuous- and Chi-square test for categorical variables as well as the Fisher's exact test when appropriate

<sup>b</sup>Matching factors
